# Supplementary material for: Controlled fabrication of hierarchical WO3·H2O hollow microspheres for enhanced visible light photocatalysis
Source: Royal Society of Chemistry journal article supplement (doi:10.1039/c4ra14312d), 2015-01-01
Supplement: c4ra14312d1.pdf [file c4ra14312d1.pdf]

## Supporting Information

### Designable Fabrication of Hierarchical $\text{WO}_3 \cdot \text{H}_2\text{O}$ Hollow Microspheres for Enhanced Visible Light Photocatalysis

Sheng-Qi Guo,<sup>a</sup> Meng-Meng Zhen,<sup>a</sup> Mei-Qing Sun,<sup>a</sup> Xiao Zhang,<sup>a</sup> Ya-Ping Zhao,<sup>\*b</sup>

Lu Liu<sup>\*a</sup>

<sup>a</sup> *Tianjin Key Laboratory of Environmental Remediation and Pollution Control, Nankai University, Tianjin 300071, China.*

<sup>b</sup> *Department of Environmental Science, East China Normal University, Shanghai 200241, China.*

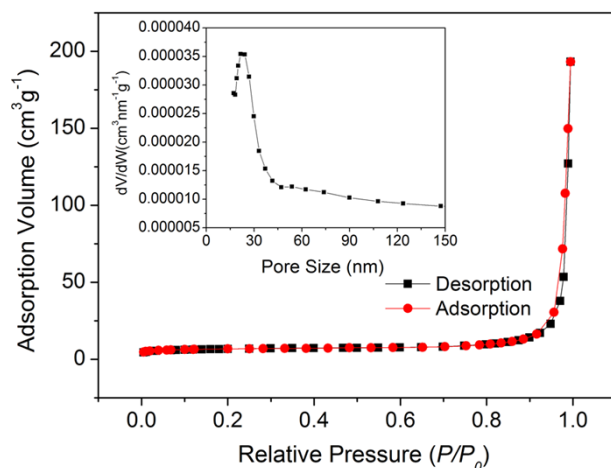

**Figure S1.**  $\text{N}_2$  adsorption/desorption isotherm and Barrett-Joyner-Halenda (BJH) pore size distribution plot (inset) of  $\text{WO}_3 \cdot \text{H}_2\text{O}$  nanoplates.

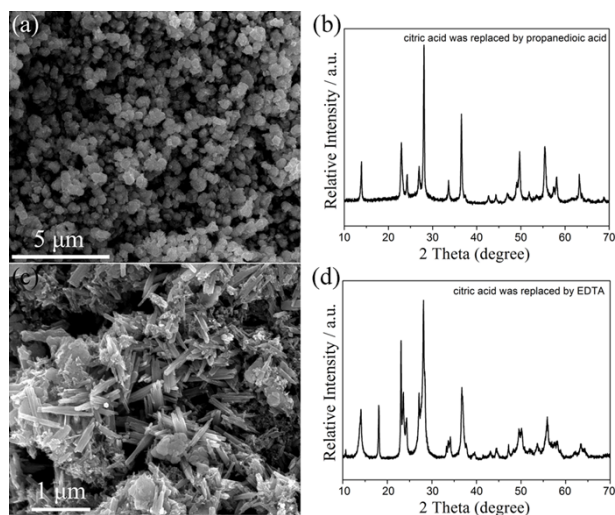

**Figure S2.** SEM images and XRD of samples synthesized by propanedioic acid a, b) and EDTA c, d).

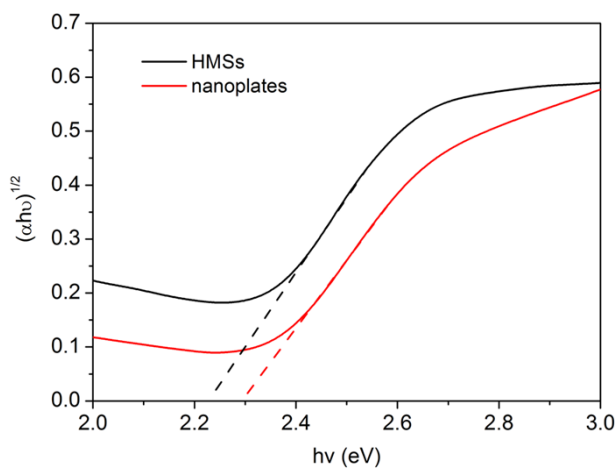

**Figure S3.** Plots of  $(\alpha h\nu)^{1/2}$  vs. photo energy of the  $\text{WO}_3 \cdot \text{H}_2\text{O}$  HMSs and  $\text{WO}_3 \cdot \text{H}_2\text{O}$  nanoplates.

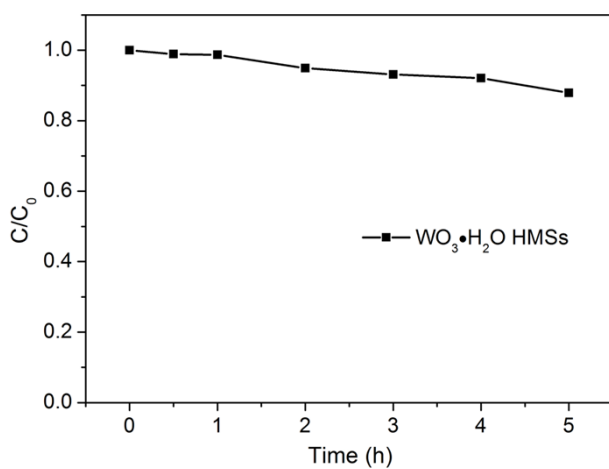

**Figure S4.** Decrease of TOC in the presence of  $\text{WO}_3 \cdot \text{H}_2\text{O}$  HMSs

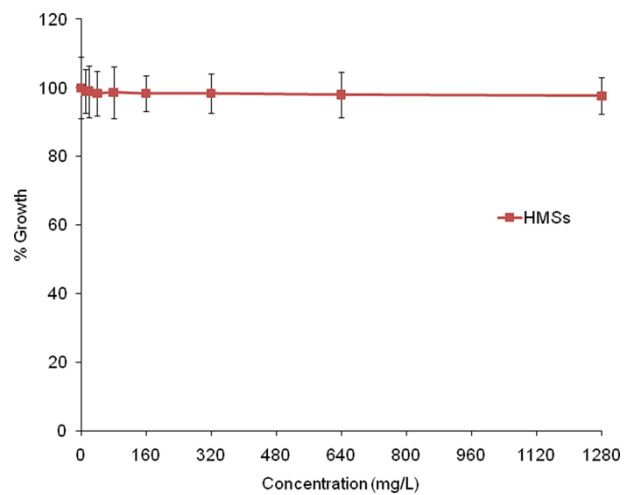

**Figure S5.** Growth inhibition in yeast incubated with various concentrations of  $\text{WO}_3 \cdot \text{H}_2\text{O}$  HMSs for 24 h.

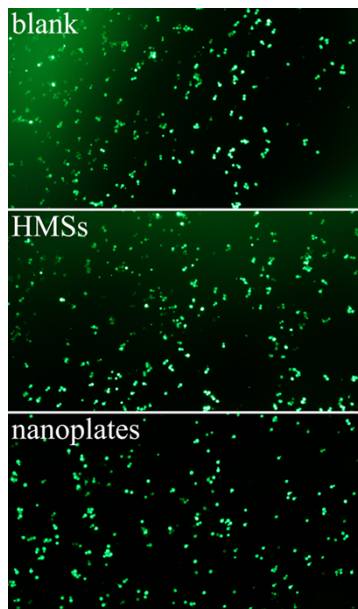

**Figure S6.** Fluorescence images of cells with/without treatment after FDA staining.
